# Supplementary material for: Test of lepton universality in beauty-quark decays
Source: Springer Nature journal article supplement (doi:10.1038/s41567-021-01478-8), 2022-03-01
Supplement: 41567_2021_1478_MOESM1_ESM.pdf [file 41567_2021_1478_MOESM1_ESM.pdf]

---

**Supplementary information**

---

**Test of lepton universality in beauty-quark decays**

---

In the format provided by the authors and unedited

## Supplementary information

A modification of the  $\bar{b} \rightarrow \bar{s}$  coupling strength can be realised in new physics models with an additional heavy neutral boson [1–24] or with leptoquarks [25–54]. Other explanations of the data involve a variety of extensions to the SM, such as supersymmetry, extended Higgs-boson sectors and models with extra dimensions [55–66].

## References

- [1] B. Bhattacharya, A. Datta, D. London, and S. Shivashankara, *Simultaneous explanation of the  $R_K$  and  $R(D^{(*)})$  puzzles*, Phys. Lett. **B742** 370 (2015).
- [2] W. Altmannshofer, S. Gori, M. Pospelov, and I. Yavin, *Quark flavor transitions in  $L_\mu - L_\tau$  models*, Phys. Rev. **D89** 095033 (2014).
- [3] A. Crivellin, G. D’Ambrosio, and J. Heeck, *Explaining  $h \rightarrow \mu^\pm \tau^\mp$ ,  $B \rightarrow K^* \mu^+ \mu^-$  and  $B \rightarrow K \mu^+ \mu^- / B \rightarrow K e^+ e^-$  in a two-Higgs-doublet model with gauged  $L_\mu - L_\tau$* , Phys. Rev. Lett. **114** 151801 (2015).
- [4] A. Celis, J. Fuentes-Martín, M. Jung, and H. Serôdio, *Family nonuniversal  $Z'$  models with protected flavor-changing interactions*, Phys. Rev. **D92** 015007 (2015).
- [5] A. Falkowski, M. Nardecchia, and R. Ziegler, *Lepton flavor non-universality in  $B$ -meson decays from a  $U(2)$  flavor model*, JHEP **11** 173 (2015).
- [6] G. Bélanger, C. Delaunay, and S. Westhoff, *A dark matter relic from muon anomalies*, Phys. Rev. D **92** 055021 (2015).
- [7] A. Crivellin, G. D’Ambrosio, and J. Heeck, *Addressing the LHC flavor anomalies with horizontal gauge symmetries*, Phys. Rev. D **91** 075006 (2015).
- [8] B. Bhattacharya *et al.*, *Simultaneous explanation of the  $R_K$  and  $R_{D^{(*)}}$  puzzles: A model analysis*, JHEP **01** 015 (2017).
- [9] S. F. King, *Flavourful  $Z'$  models for  $R_{K^{(*)}}$* , JHEP **08** 019 (2017).
- [10] C.-W. Chiang, X.-G. He, J. Tandean, and X.-B. Yuan,  *$R_{K^{(*)}}$  and related  $b \rightarrow s \bar{l} \bar{l}$  anomalies in minimal flavor violation framework with  $Z'$  boson*, Phys. Rev. D **96** 115022 (2017).
- [11] A. Falkowski, S. F. King, E. Perdomo, and M. Pierre, *Flavourful  $Z'$  portal for vector-like neutrino dark matter and  $R_{K^{(*)}}$* , JHEP **08** 061 (2018).
- [12] B. C. Allanach, J. M. Butterworth, and T. Corbett, *Collider constraints on  $Z'$  models for neutral current  $B$ -anomalies*, JHEP **08** 106 (2019).
- [13] B. C. Allanach and J. Davighi, *Naturalising the third family hypercharge model for neutral current  $B$ -anomalies*, Eur. Phys. J. **C79** 908 (2019).

- [14] J. Kawamura, S. Raby, and A. Trautner, *Complete vectorlike fourth family and new  $U(1)'$  for muon anomalies*, Phys. Rev. **D100** 055030 (2019).
- [15] S. Dwivedi, D. Kumar Ghosh, A. Falkowski, and N. Ghosh, *Associated  $Z'$  production in the flavorful  $U(1)$  scenario for  $R_{K^{(*)}}$* , Eur. Phys. J. **C80** 263 (2020).
- [16] Z.-L. Han, R. Ding, S.-J. Lin, and B. Zhu, *Gauged  $U(1)_{L_\mu-L_\tau}$  scotogenic model in light of  $R_{K^{(*)}}$  anomaly and AMS-02 positron excess*, Eur. Phys. J. **C79** 1007 (2019).
- [17] B. Capdevila, A. Crivellin, C. A. Manzari, and M. Montull, *Explaining  $b \rightarrow sl^+\ell^-$  and the Cabibbo angle anomaly with a vector triplet*, Phys. Rev. **D103** 015032 (2021).
- [18] W. Altmannshofer, J. Davighi, and M. Nardecchia, *Gauging the accidental symmetries of the Standard Model, and implications for the flavor anomalies*, Phys. Rev. **D101** 015004 (2020).
- [19] S.-L. Chen *et al.*, *Signatures of a flavor changing  $Z'$  boson in  $B_q \rightarrow \gamma Z'$* , Nucl. Phys. **B962** 115237 (2021).
- [20] A. Carvunis, D. Guadagnoli, M. Reboud, and P. Stangl, *Composite dark matter and a horizontal symmetry*, JHEP **02** 056 (2021).
- [21] A. Karozas, G. K. Leontaris, I. Tavellaris, and N. D. Vlachos, *On the LHC signatures of  $SU(5) \times U(1)'$  F-theory motivated models*, Eur. Phys. J. **C81** 35 (2021).
- [22] D. Borah, L. Mukherjee, and S. Nandi, *Low scale  $U(1)_X$  gauge symmetry as an origin of dark matter, neutrino mass and flavour anomalies*, JHEP **12** 052 (2020).
- [23] B. C. Allanach,  *$U(1)_{B_3-L_2}$  explanation of the neutral current  $B$ -anomalies*, Eur. Phys. J. **C81** 56 (2021).
- [24] J.-H. Sheng, *The analysis of  $b \rightarrow sl^+\ell^-$  in the family non-universal  $Z'$  Model*, Int. J. Theor. Phys. **60** 26 (2021).
- [25] G. Hiller and M. Schmaltz,  *$R_K$  and future  $b \rightarrow s\ell\ell$  physics beyond the Standard Model opportunities*, Phys. Rev. **D90** 054014 (2014).
- [26] B. Gripaios, M. Nardecchia, and S. A. Renner, *Composite leptoquarks and anomalies in  $B$ -meson decays*, JHEP **05** 006 (2015).
- [27] I. de Medeiros Varzielas and G. Hiller, *Clues for flavor from rare lepton and quark decays*, JHEP **06** 072 (2015).
- [28] R. Barbieri, C. W. Murphy, and F. Senia,  *$B$ -decay anomalies in a composite leptoquark model*, Eur. Phys. J. **C77** 8 (2017).
- [29] L. Di Luzio, A. Greljo, and M. Nardecchia, *Gauge leptoquark as the origin of  $B$ -physics anomalies*, Phys. Rev. D **96** 115011 (2017).
- [30] A. Crivellin, D. Müller, and T. Ota, *Simultaneous explanation of  $R(D^{(*)})$  and  $b \rightarrow s\mu^+\mu^-$ : the last scalar leptoquarks standing*, JHEP **09** 040 (2017).

- [31] D. Bečirević and O. Sumensari, *A leptoquark model to accommodate  $R_K^{\text{exp}} < R_K^{\text{SM}}$  and  $R_{K^*}^{\text{exp}} < R_{K^*}^{\text{SM}}$* , JHEP **08** 104 (2017).
- [32] A. Greljo and B. A. Stefanek, *Third family quark–lepton unification at the TeV scale*, Phys. Lett. B **782** 131 (2018).
- [33] M. Bordone, C. Cornella, J. Fuentes-Martín, and G. Isidori, *Low-energy signatures of the PS3 model: from B-physics anomalies to LFV*, JHEP **10** 148 (2018).
- [34] B. Fornal, S. A. Gadam, and B. Grinstein, *Left-right  $SU(4)$  vector leptoquark model for flavor anomalies*, Phys. Rev. **D99** 055025 (2019).
- [35] A. Angelescu, D. Bečirević, D. A. Faroughy, and O. Sumensari, *Closing the window on single leptoquark solutions to the B-physics anomalies*, JHEP **10** 183 (2018).
- [36] D. Bečirević *et al.*, *Scalar leptoquarks from grand unified theories to accommodate the B-physics anomalies*, Phys. Rev. D **98** 055003 (2018).
- [37] S. Balaji and M. A. Schmidt, *Unified  $SU(4)$  theory for the  $R_{D^{(*)}}$  and  $R_{K^{(*)}}$  anomalies*, Phys. Rev. **D101** 015026 (2020).
- [38] C. Cornella, J. Fuentes-Martin, and G. Isidori, *Revisiting the vector leptoquark explanation of the B-physics anomalies*, JHEP **07** 168 (2019).
- [39] A. Datta, D. Sachdeva, and J. Waite, *Unified explanation of  $b \rightarrow s\mu^+\mu^-$  anomalies, neutrino masses, and  $B \rightarrow \pi K$  puzzle*, Phys. Rev. **D100** 055015 (2019).
- [40] O. Popov, M. A. Schmidt, and G. White,  *$R_2$  as a single leptoquark solution to  $R_{D^{(*)}}$  and  $R_{K^{(*)}}$* , Phys. Rev. **D100** 035028 (2019).
- [41] I. Bigaran, J. Gargalionis, and R. R. Volkas, *A near-minimal leptoquark model for reconciling flavour anomalies and generating radiative neutrino masses*, JHEP **10** 106 (2019).
- [42] J. Bernigaud, I. de Medeiros Varzielas, and J. Talbert, *Finite family groups for fermionic and leptoquark mixing patterns*, JHEP **01** 194 (2020).
- [43] L. Da Rold and F. Lamagna, *A vector leptoquark for the B-physics anomalies from a composite GUT*, JHEP **12** 112 (2019).
- [44] J. Fuentes-Martín, M. Reig, and A. Vicente, *Strong CP problem with low-energy emergent QCD: The  $4321$  case*, Phys. Rev. **D100** 115028 (2019).
- [45] C. Hati, J. Kriewald, J. Orloff, and A. M. Teixeira, *A non-unitary interpretation for a single vector leptoquark combined explanation to the B-decay anomalies*, JHEP **12** 006 (2019).
- [46] A. Datta, J. L. Feng, S. Kamali, and J. Kumar, *Resolving the  $(g - 2)_\mu$  and B anomalies with leptoquarks and a dark Higgs boson*, Phys. Rev. **D101** 035010 (2020).
- [47] A. Crivellin, D. Müller, and F. Saturnino, *Flavor phenomenology of the leptoquark singlet-triplet model*, JHEP **06** 020 (2020).

- [48] C. Borschensky, B. Fuks, A. Kulesza, and D. Schwartländer, *Scalar leptoquark pair production at hadron colliders*, Phys. Rev. **D101** 115017 (2020).
- [49] S. Saad, *Combined explanations of  $(g - 2)_\mu$ ,  $R_{D^{(*)}}$ ,  $R_{K^{(*)}}$  anomalies in a two-loop radiative neutrino mass model*, Phys. Rev. **D102** 015019 (2020).
- [50] J. Fuentes-Martín and P. Stangl, *Third-family quark-lepton unification with a fundamental composite Higgs*, Phys. Lett. **B811** 135953 (2020).
- [51] P. S. Bhupal Dev, R. Mohanta, S. Patra, and S. Sahoo, *Unified explanation of flavor anomalies, radiative neutrino masses, and ANITA anomalous events in a vector leptoquark model*, Phys. Rev. **D102** 095012 (2020).
- [52] B. Fornal, *Gravitational wave signatures of lepton universality violation*, Phys. Rev. **D103** 015018 (2021).
- [53] J. Davighi, M. Kirk, and M. Nardecchia, *Anomalies and accidental symmetries: charging the scalar leptoquark under  $L_\mu - L_\tau$* , JHEP **12** 111 (2020).
- [54] K. S. Babu, P. S. B. Dev, S. Jana, and A. Thapa, *Unified framework for  $B$ -anomalies, muon  $g - 2$  and neutrino masses*, JHEP **03** 179 (2021).
- [55] B. Barman, D. Borah, L. Mukherjee, and S. Nandi, *Correlating the anomalous results in  $b \rightarrow s$  decays with inert Higgs doublet dark matter and muon  $(g - 2)$* , Phys. Rev. **D100** 115010 (2019).
- [56] M. Blanke and A. Crivellin,  *$B$  meson anomalies in a Pati-Salam model within the Randall-Sundrum background*, Phys. Rev. Lett. **121** 011801 (2018).
- [57] S.-P. Li, X.-Q. Li, Y.-D. Yang, and X. Zhang,  *$R_{D^{(*)}}$ ,  $R_{K^{(*)}}$  and neutrino mass in the 2HDM-III with right-handed neutrinos*, JHEP **09** 149 (2018).
- [58] A. Shaw, *Looking for  $B \rightarrow X_s \ell^+ \ell^-$  in a nonminimal universal extra dimensional model*, Phys. Rev. **D99** 115030 (2019).
- [59] P. Arnan, A. Crivellin, M. Fedele, and F. Mescia, *Generic loop effects of new scalars and fermions in  $b \rightarrow s \ell^+ \ell^-$  and a vector-like 4<sup>th</sup> generation*, JHEP **06** 118 (2019).
- [60] S. Trifinopoulos,  *$B$ -physics anomalies: The bridge between  $R$ -parity violating supersymmetry and flavored dark matter*, Phys. Rev. **D100** 115022 (2019).
- [61] L. Delle Rose, S. Khalil, S. J. D. King, and S. Moretti,  *$R_K$  and  $R_{K^*}$  in an aligned 2HDM with right-handed neutrinos*, Phys. Rev. **D101** 115009 (2020).
- [62] A. Ordell, R. Pasechnik, H. Serôdio, and F. Nottensteiner, *Classification of anomaly-free 2HDMs with a gauged  $U(1)'$  symmetry*, Phys. Rev. **D100** 115038 (2019).
- [63] C. Marzo, L. Marzola, and M. Raidal, *Common explanation to the  $R_{K^{(*)}}$ ,  $R_{D^{(*)}}$  and  $\epsilon'/\epsilon$  anomalies in a 3HDM+ $\nu_R$  and connections to neutrino physics*, Phys. Rev. **D100** 055031 (2019).
- [64] L. Darmé, M. Fedele, K. Kowalska, and E. M. Sessolo, *Flavour anomalies from a split dark sector*, JHEP **08** 148 (2020).

- [65] Q.-Y. Hu and L.-L. Huang, *Explaining  $b \rightarrow s\ell^+\ell^-$  data by sneutrinos in the  $R$ -parity violating MSSM*, Phys. Rev. **D101** 035030 (2020).
- [66] Q.-Y. Hu, Y.-D. Yang, and M.-D. Zheng, *Revisiting the  $B$ -physics anomalies in  $R$ -parity violating MSSM*, Eur. Phys. J. **C80** 365 (2020).
